# Supplementary material
Source: Royal Society of Chemistry journal article supplement (doi:10.1039/d6gc01261b)
Supplement: d6gc01261b2.pdf [file d6gc01261b2.pdf]

## Supplementary material

# Application-driven design of biocatalyst for the continuous synthesis of levulinate esters from $\alpha$ -angelica lactone: synergistic effect of silica, triflate ionic liquid and lipase

P. Latos,<sup>\*a</sup> A. Wolny,<sup>a</sup> P. Powroźnik,<sup>b</sup> S. Jurczyk,<sup>c</sup> M. Krzywiecki,<sup>b</sup> A. Chrobok<sup>\*a</sup>

<sup>a</sup> Silesian University of Technology, Faculty of Chemistry, Department of Organic Chemical Technology and Petrochemistry, 44-100 Gliwice, Poland

<sup>b</sup> Silesian University of Technology, Institute of Physics - Research and Teaching Center, Department of Applied Physics, 44-100 Gliwice, Poland

<sup>c</sup> Institute for Engineering of Polymer Materials and Dyes, M. Skłodowskiej-Curie 55, 87-100 Toruń, Poland

\*Corresponding author. Email: [piotr.latos@polsl.pl](mailto:piotr.latos@polsl.pl); [anna.chrobok@polsl.pl](mailto:anna.chrobok@polsl.pl)

### [N<sub>8,8,8,1</sub>][OTf]:

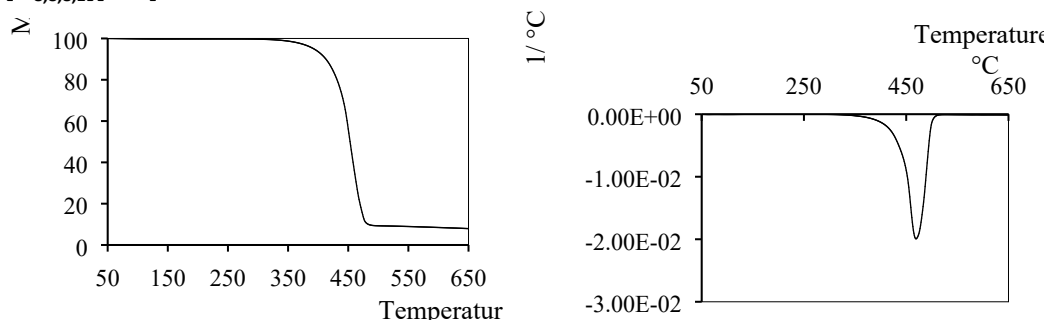

Fig. S1. TGA/DTG Analysis for [N<sub>8,8,8,1</sub>][OTf].

### CALB:

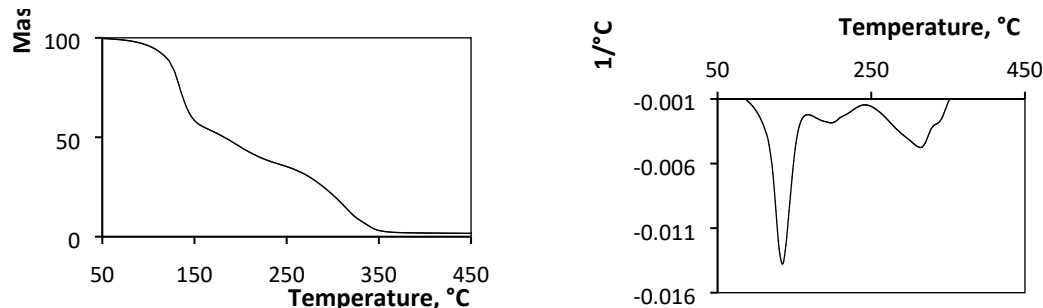

Fig. S2. TGA/DTG Analysis for CALB.

**SiO<sub>2</sub>-[N<sub>8,8,8,1</sub>][OTf]:**

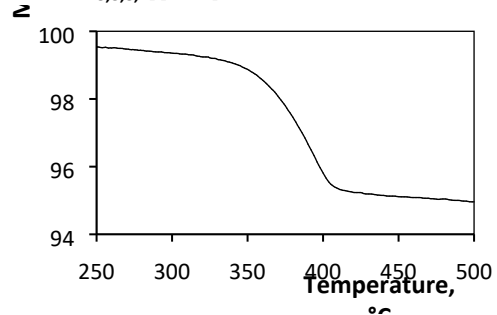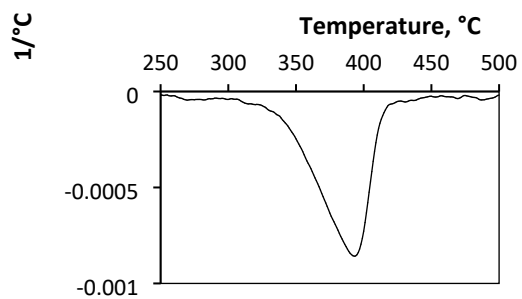

**Fig. S3.** TGA/DTG Analysis for SiO<sub>2</sub>-[N<sub>8,8,8,1</sub>][OTf].

**SiO<sub>2</sub>-[N<sub>8,8,8,1</sub>][OTf] -CALB:**

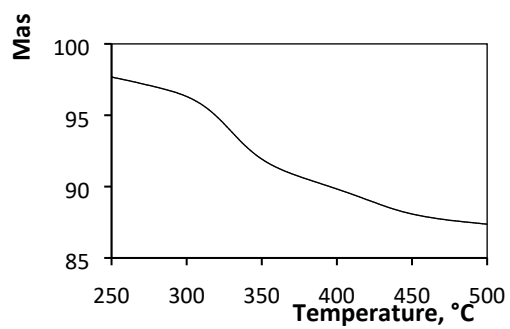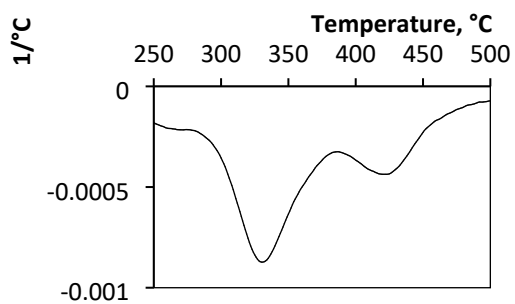

**Fig. S4.** TGA/DTG Analysis for SiO<sub>2</sub>-[N<sub>8,8,8,1</sub>][OTf] -CALB.

**SiO<sub>2</sub>- [N<sub>8,8,8,1</sub>][OTf] -CALB recycled:**

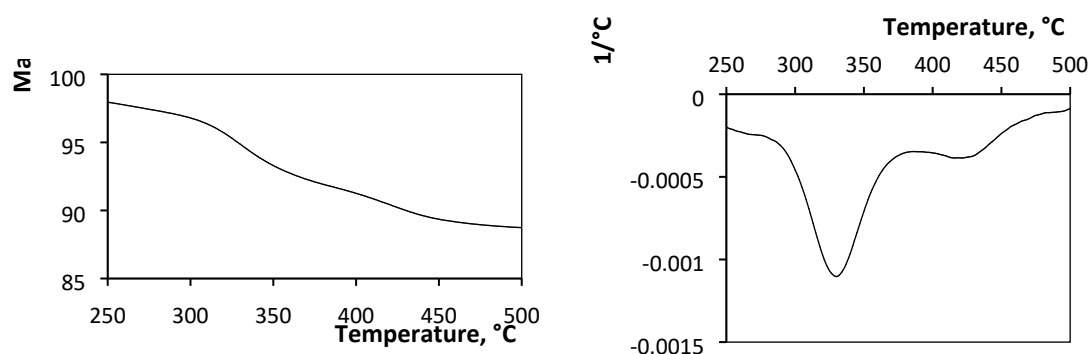

**SiO<sub>2</sub>- [N<sub>8,8,8,1</sub>][OTf] -CALB after 144 h in the flow reactor:**

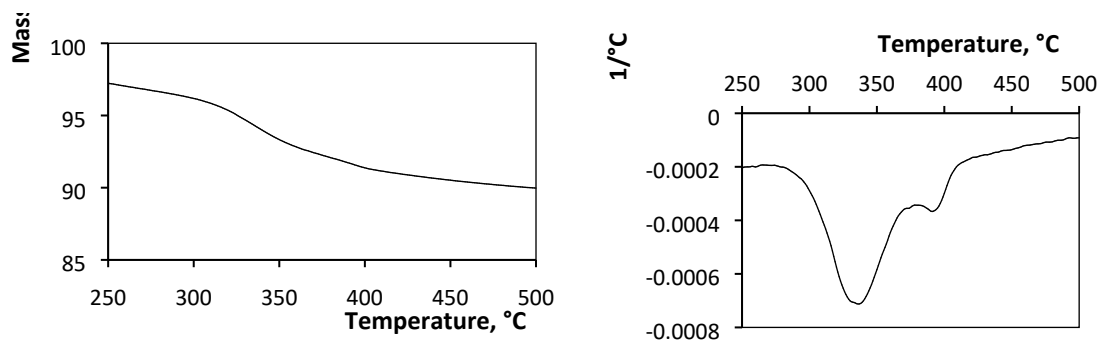

**Fig. S5.** TGA/DTG Analysis of SiO<sub>2</sub>-[N<sub>8,8,8,1</sub>][OTf] -CALB after reactions.

**SiO<sub>2</sub>**

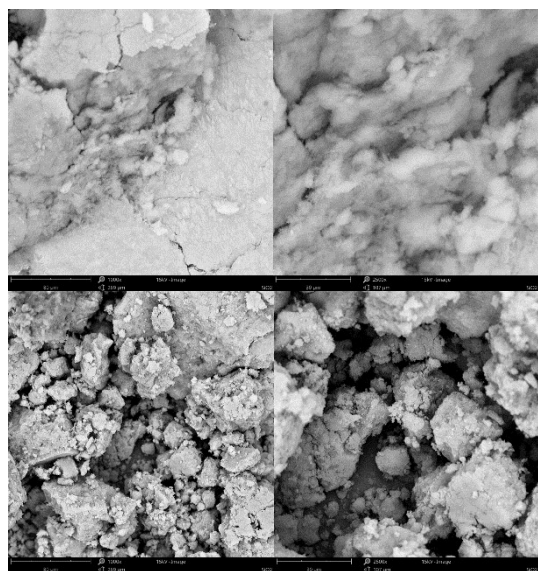

**SiO<sub>2</sub>- [N<sub>8,8,8,1</sub>][OTf] -CALB**

**Fig. S6.** SEM analysis of silica and SiO<sub>2</sub>-[N<sub>8,8,8,1</sub>][OTf] -CALB.
